# Supplementary material
Source: PubMed Central journal article supplement (PMC6043161)
Supplement: NIHMS980012-supplement-supplement_1.pdf [file NIHMS980012-supplement-supplement_1.pdf]

Supplemental Table I: Dry AMD Biomarkers: Values &gt; Mean Plus 2 x SD of Normal Values

| Variable                                                                  | Early  | Intermediate | Normal | P-Value*        |
|---------------------------------------------------------------------------|--------|--------------|--------|-----------------|
| BCVA (EDTRS) $\geq$ 92.71                                                 | 0      | 0            | 0      | ---             |
| LLVA: BCVA (EDTRS) With Density Filter $\geq$ 81.76                       | 1 (3)  | 0            | 0      | 0.55            |
| Calculated LLD (ETDRS) $\geq$ 17.95                                       | 3 (9)  | 10 (21)      | 0      | <b>0.04</b>     |
| Percent Reduced Thresholds $\geq$ 66.62                                   | 2 (6)  | 14 (30)      | 1 (5)  | <b>0.01</b>     |
| Average Threshold $\geq$ 34.28                                            | 0      | 0            | 0      | ---             |
| Computerized BCVA $\geq$ 96.50                                            | 1 (3)  | 0            | 0      | 0.55            |
| Computerized LLVA 1 $\geq$ 83.39                                          | 2 (6)  | 0            | 1 (5)  | 0.21            |
| Computerized LLVA 2 $\geq$ 75.05                                          | 1 (3)  | 0            | 1 (5)  | 0.28            |
| Calculated Computerized LLD 1 (ETDRS)=BCVA-LLVA $\geq$ 24.10              | 1 (3)  | 2 (4)        | 0      | 1.00            |
| Calculated Computerized LLD 2 (ETDRS)=BCVA-LLVA $\geq$ 40.87              | 3 (9)  | 8 (18)       | 1 (5)  | 0.34            |
| CCT Red $\geq$ 110.66                                                     | 0      | 0            | 0      | ---             |
| CCT Green $\geq$ 111.02                                                   | 0      | 0            | 0      | ---             |
| CCT Blue $\geq$ 115.81                                                    | 0      | 0            | 0      | ---             |
| Rod Intercept $\geq$ 16.60                                                | 3 (10) | 17 (45)      | 3 (14) | <b>&lt;0.01</b> |
| <i>*P-value based on Fisher's exact test of difference in proportions</i> |        |              |        |                 |
